# Supplementary material for: Exploring Ligand Binding Domain Dynamics in the NRs Superfamily
Source: Int J Mol Sci. 2022 Aug 5;23(15):8732. doi: 10.3390/ijms23158732 (PMC9369052; doi:10.3390/ijms23158732)
Supplement: Supplementary file 1 [file ijms-23-08732-s001.zip › PDB-IDs.xlsx]

## Sheet: NR1
Receptor	PDI-ID	Resolution	Receptor	PDI-ID	Resolution	Receptor	PDI-ID	Resolution	Receptor	PDI-ID	Resolution	Receptor	PDB-ID	Resolution	Receptor	PDB-ID	Resolution	Receptor	PDB-ID	Resolution	Receptor	PDB-ID	Resolution	Receptor	PDB-ID	Resolution	Receptor	PDB-ID	Resolution	Receptor	PDB-ID	Resolution	Receptor	PDB-ID	Resolution	Receptor	PDB-ID	Resolution	Receptor	PDB-ID	Resolution
FXR	30MK	1.90	LXRβ	1PQ6	2.40	PPARα	1K7L	2.50	PPARδ	1GWX	2.5	PPARγ	1FM6	2.1	PXR	1NRL	2.0	RARα	1DKF	2.50	RARβ	4DM6	1.90	RARγ	1EXA	1.59	RORα	1N83	1.63	RORγ	3KYT	2.35	THRα	1NAV	2.50	THRβ	1NQ0	2.40	VDR	1DB1	1.80
	3BEJ	1.90		1PQ9	2.10		2NPA	2.30		3GWX	2.40		1FM9	2.10		4XHD	2.4		3KMR	1.80		4DM8	2.30		1EXX	1.67		1S0X	2.20		3L0J	2.4		2H77	2.33		1NQ2	2.40		1IE8	1.52
	3OKI	2.0		1UPV	2.10		2P54	1.79		3GZ9	2.0		1K74	2.30		6DUP	2.30		5K13	1.85		4JYG	2.35		1FCX	1.47		4S15	1.90		3L0L	1.74		2H79	1.87		1XZX	2.50		1IE9	1.40
	3OLF	1.90		3KFC	2.40		2ZNN	2.01		3SP9	2.3		1KNU	2.50		5A86	2.25		3KMZ	2.10		4JYI	1.90		1FCY	1.30					4NIE	2.01		3HZF	2.50		2J4A	2.20		1S0Z	2.50
	3OMM	2.10		3L0E	2.30		3ET1	2.50		5U3Q	1.50		1ZGY	1.8											1FCZ	1.38					4QM0	2.20		3ILZ	1.85		3GWS	2.20		1S19	2.10
	3OOF	2.29		4DK7	2.45		3SP6	2.21		5U3R	1.95		2ATH	2.28											1FD0	1.38					4WLB	1.70		3JZB	2.00		3JZC	2.50		1TXI	1.90
	3OOK	2.29		5JY3	2.40		3VI8	1.75		5U3S	2.0		2F4B	2.07											3LBD	2.40					4WPF	2.20		4LNW*	1.90		1N46	2.20		2HAR	1.90
	5ICK	2.47					4BCR	2.50		5U3T	1.7		2G0H	2.30											4LBD	2.50					4WQP	1.99		4LNX	2.05		2PIN*	2.30		2HAS	1.96
	5Q0J	2.0					5HYK	1.83		5U3V	1.84		2I4J	2.1											5M24	1.69					4XT9	2.25	* contains also the alternative pocket				3D57	2.20		2HB7	1.80
	5Q0M	2.20								5U3W	1.8		2I4P	2.1											6FX0	1.90					4YMQ	2.0				* contains also the alternative pocket				2HB8	2.0
	5Q0N	2.40								5U3Z	1.72		2I4Z	2.25																	4ZOM	2.27								3A3Z	1.72
	5Q0O	1.90								5U40	2.0		2ZK2	2.26																	5APH	1.54								3A40	1.45
	5Q0P	1.80								5U41	1.9		2ZK6	2.41																	5APJ	2.08								3A78	1.90
	5Q0R	1.91								5U42	1.7		2ZVT	1.90																	5APK	2.10								3AUR	2.21
	5Q0S	2.50								5U43	1.9		3ADW	2.07																	5IXK	2.35								3AZ1	1.50
	5Q0T	2.14								5U45	1.95		3ADX	1.95																	5M96	1.77								3AZ2	1.69
	5Q0U	1.90								5U46	2.0		3D6D	2.4																	5NI5	2.3								3AZ3	1.36
	5Q0V	1.87											3GBK	2.3																	5NI7	2.45								3B0T	1.30
	5Q0W	1.90											3HOD	2.10																	5NI8	1.94								3CS4	2.0
	5Q0Y	2.20											3NOA	1.98																	5NIB	1.82								3CS6	1.80
	5Q0Z	2.26											3QT0	2.5																	5NTK	1.90								3KPZ	1.90
	5Q10	2.20											3R8I	2.3																	5NTP	1.70								3OGT	1.75
	5Q11	2.20											3TY0	2.0																	5NTQ	2.26								3TKC	1.75
	5Q12	2.0											4E4K	2.5																	5NTQ	2.26								3VHW	2.43
	5Q13	1.90											4E4Q	2.5																	5NTW	1.64								3W0A	1.80
	5Q14	1.85											4JL4	2.5																	5NTW	1.64								3W0C	1.90
	5Q15	1.90											5GTN	1.85																	5NU1	1.85								3W0Y	1.98
	5Q16	2.0											5GTP	2.35																	5UFR	2.07								3WGP	2.0
	5Q18	1.90											5TWO	1.93																	5X8Q	2.20								3X31	2.11
	5Q19	1.98											6C1I	2.26																	5YP6	2.20								3X36	1.93
	5Q1A	2.0											6D8X	1.9																	6BN6	2.40								4ITE	2.49
	5Q1B	2.30											6D94	1.9																	6CN5	2.30								5GT4	1.83
	5Q1C	2.30											6DGR	2.15																	6CN6	2.45								5V39	2.20
	5Q1D	1.89											6FZF	1.95																	6ESN	1.84								5YSY	2.0
	5Q1E	1.85											6FZG	2.1																	6FZU	1.80								5YT2	2.0
	5Q1F	2.30											6FZP	2.30																	6G05	1.90								2HAM	1.90
	5Q1H	2.20											Both chains of 2ATH, 2F4B, 6FZF and 3NOA were used.																		6G07	1.66								3M7R	1.80
	5Q1I	1.95																													6IVX	2.35								3P8X	1.70
	5Y44	2.35																													6J1L	2.30								4G2I	1.80
	5Y49	2.40																													6Q2W	1.99
	5YXL	2.24																													4YPQ*	2.32
	6A5Y	2.10																													5C4O*	2.24
	6HL0	1.66																													5C4S*	2.23
	Both chains of 3OOF and 5ICK were used.																														5C4T*	1.77
																															5C4U*	2.08
																														* contain the alternative pocket

## Sheet: NR3
Receptor	PDB-ID	Resolution	Receptor	PDB-ID	Resolution	Receptor	PDB-ID	Resolution	Receptor	PDB-ID	Resolution	Receptor	PDB-ID	Resolution	Receptor	PDB-ID	Resolution	Receptor	PDB-ID	Resolution
AR	1E3G	2.40	ERα	1GWQ	2.45	ER2β	1QKM	1.80	ERRγ	2E2R	1.60	GR	1M2Z	2.50	MR	1Y9R	1.96	PR	1A28	1.8
	1GS4	1.95		1GWR	2.40		1U3Q	2.40		2EWP	2.30		3BQD	2.50		1YA3	2.34		1SQN	1.45
	1T5Z	2.30		1L2I	1.95		1U3R	2.21		2GPU	1.70		3E7C	2.15		2A3I	1.95		1SR7	1.46
	1T63	2.07		1QKT	2.20		1U3S	2.50		2P7A	2.30		3K22	2.10		2AA2	1.95		1ZUC	2.0
	1T65	1.66		1X7R	2.0		1U9E	2.40		2P7Z	2.50		4CSJ	2.30		2AA5	2.20		2OVH	2.0
	1XOW	1.80		1XP1	1.80		1X76	2.20		2ZAS	2.0		4P6W	1.95		2AA6	1.95		2W8Y	1.80
	1XQ3	2.25		1XP6	1.70		1X78	2.30		2ZKC	1.70		4P6X	2.50		2AA7	2.20		3D90	2.26
	1Z95	1.80		1XP9	1.80		1X7B	2.30		2P7G	2.10		4UDC	2.50		2AAX	1.75		3G8O	1.90
	2AM9	1.64		1XPC	1.60		1X7J	2.30					4UDD	1.80		2AB2	1.75		3HQ5	2.10
	2AMA	1.90		1YIM	1.90		1YYE	2.03					5G3J	2.40		2ABI	2.33		3KBA	2.0
	2AMB	1.75		1ZKY	2.25		1ZAF	2.20					5G5W	2.20		2OAX	2.29		3ZR7	1.65
	2AO6	1.89		2AYR	1.90		2GIU	2.20					5NFP	2.10		3VHU	2.11		3ZRA	1.90
	2AX6	1.50		2B1V	1.80		2I0G	2.50					5NFT	2.30		3VHV	1.35		3ZRB	1.80
	2AX7	1.90		2B1Z	1.78		2JJ3	2.28					6EL6	2.40		3WFF	2.05		4A2J	2.0
	2AX8	1.70		2FAI	2.10		2NV7	2.10					6EL7	2.18		3WFG	1.40		4APU	1.90
	2AX9	1.65		2G5O	2.30		2YJD	1.93					6EL9	2.19		4PF3	1.10	Both chains of 4APU and 2W8Y were used.
	2AXA	1.80		2IOG	1.95		2Z4B	2.34				Both chains from 1M2Z and chains A and K from 4P6X were used.				4UDA	2.03
	2HVC	2.10		2QA8	1.85		3OLL	1.50								4UDB	2.03
	2OZ7	1.80		2QAB	1.89		3OLS	2.20								5HCV	2.50
	2PIO	2.03		2QGT	2.15		3OMO	2.21								5L7E	1.86
	2PIP*	1.80		2QGW	2.39		3OMP	2.05								5L7G	2.01
	2PIQ	2.40		2QR9	2.0		3OMQ	1.97								5L7H	1.84
	2PIR	2.10		2QSE	1.85		4J24	2.10								5MWP	1.82
	2PIT	1.76		2QXM	2.30		4J26	2.30								5MWY	1.75
	2PIU*	2.12		2QXS	1.70		4ZI1	2.10								6GEV	1.54
	2PIV	1.95		2YJA	1.82		5TOA	2.50								6GG8	1.80
	2PIX	2.40		3ERD	2.03		Both chains from 3OLS were used.									6GGG	1.71
	2PKL	2.49		3HM1	2.33										Both chains from 2AB2 were used.
	2PNU	1.65		3L03	1.90
	2Q7I	1.87		3Q95	2.05
	2Q7J	1.90		3UU7	2.20
	2Q7K	1.80		3UUA	2.05
	2Q7L	1.92		3UUD	1.60
	2YHD	2.20		4DMA	2.30
	2YLO	2.50		4IU7	2.29
	2YLP	2.30		4IV2	2.14
	2YLQ	2.40		4IV4	2.30
	3B5R	1.80		4IVW	2.06
	3B65	1.80		4IVY	1.95
	3B66	1.65		4IW6	1.98
	3B67	1.90		4IWF	1.93
	3B68	1.90		4MG5	2.05
	3L3X	1.55		4MG7	2.15
	3L3Z	2.0		4MG8	1.85
	3RLJ	1.90		4MG9	2.0
	3RLL	1.70		4MGA	1.80
	3V49	1.70		4MGB	1.85
	3V4A	1.95		4MGC	2.15
	3ZQT	2.29		4MGD	1.90
	4HLW	2.50		4PP6	2.20
	4K7A	2.44		4PPS	1.93
	4OEA	2.12		4PXM	1.90
	4OEY	1.83		4TUZ	1.90
	4OEZ	1.80		4ZN7	1.93
	4OFR	2.26		4ZN9	2.21
	4OFU	2.12		4ZNH	1.93
	4OH5	2.0		4ZNU	2.40
	4OHA	1.42		4ZNV	1.77
	4OJB	2.0		4ZNW	2.31
	4OK1	2.09		5DI7	2.24
	4OKT	2.50		5DID	2.24
	4OKW	2.0		5DIG	2.24
	4OKX	2.10		5DK9	2.28
	4QL8	2.10		5DLR	2.26
	5CJ6	2.07		5DRJ	2.07
	5JJM	2.15		5DTV	2.29
	5V8Q	1.44		5DU5	2.19
	5VO4	2.35		5DUE	2.09
* contain also the alternative pocket				5DUG	2.25
				5DUH	2.24
				5DVS	2.28
				5DWE	1.92
				5DWG	2.30
				5DWI	2.43
				5DWJ	2.0
				5DX3	2.09
				5DXB	2.08
				5DXE	1.50
				5DXG	1.86
				5DXK	2.23
				5DXM	2.37
				5DXQ	2.40
				5DXR	2.28
				5DY8	2.03
				5DYB	2.27
				5DYD	2.48
				5DZ0	2.24
				5DZ3	2.15
				5DZI	1.90
				5E0W	2.0
				5E0X	2.01
				5E14	2.22
				5EI1	2.40
				5FQP	1.88
				5FQV	1.74
				5GS4	2.40
				5HYR	2.27
				5KCD	1.82
				5KCF	2.07
				5KD9	1.78
				5KR9	2.25
				5KRA	2.40
				5KRC	2.40
				5KRF	2.19
				5KRJ	2.70
				5KRK	2.39
				5KRL	2.40
				5KRM	2.24
				5KRO	2.10
				5T1Z	2.10
				5TLF	2.20
				5TLG	2.23
				5TLL	2.42
				5TLO	2.28
				5TLP	2.08
				5TLV	2.32
				5TLX	2.10
				5TLY	2.14
				5TM1	2.23
				5TM3	2.19
				5TML	2.25
				5TMM	2.20
				5TMR	2.30
				5TMS	2.24
				5TMT	2.05
				5TMU	2.43
				5TMV	2.38
				5TMW	2.29
				5TMZ	2.21
				5TN1	2.06
				5TN4	1.86
				5TN5	1.89
				5TN6	2.09
				5TN7	2.24
				5U2D	1.86
				5UFW	1.58
				5UFX	1.55
				5WGD	1.80
				5WGQ	2.30
				6C42	2.0
				6CBZ	1.65
				6CHW	1.89
				6CZN	2.50
				6IAR	1.84
			Both chains from IL2I, 5DYD, 5UFW, 2QXS were used.

## Sheet: NR2-NR4-NR5
NR2						NR4						NR5
Receptor	PDB-ID	Resolution	Receptor	PDB-ID	Resolution	Receptor	PDB-ID	Resolution	Receptor	PDB-ID	Resolution	Receptor	PDB-ID	Resolution	Receptor	PDB-ID	Resolution
HNF4α	1PZL	2.10	RXRα	1FBY	2.25	NGFI-B	4RE8	2.16	NURR1	5Y41	2.05	LRH-1	1YUC	1.9	SF-1	1YOW	3.0
	3FS1	2.20		1FM6	2.10		4REE	2.37		6DDA	3.20		3PLZ	1.75		1ZDT	2.10
	4IQR	2.90		1FM9	2.10		4WHG	2.18		5YD6	2.34		1YOK	2.50		4QJR	2.40
				1K74	2.30		4WHF	2.27					4DOS	2.0		4QK4	2.81
				1MV9	1.90		3V3Q	2.22					4ONI	1.80
				1MVC	1.90								4PLE	1.75
				1MZN	1.90								5L11	1.85
				1RDT	2.40								5UNJ	1.96
				2P1T	1.80								1ZDU	2.50
				2P1U	2.12								4RWV	1.86
				2P1V	1.95								5SYZ	1.93
				3FUG	2.0								4DOR	1.90
				3H0A	2.10							Both chains from 1YUC and 3PLZ were used.
				3KWY	2.30
				3OAP	2.05
				3OZJ	2.10
				3PCU	2.0
				4K4J	2.0
				4K6I	2.10
				4M8E	2.40
				4M8H	2.20
				4OC7	2.50
				4POH	2.30
				4POJ	2.0
				4PP3	2.0
				4PP5	2.0
				4RFW	2.40
				4RMD	1.90
				4RME	2.30
				4ZSH	1.80
				5EC9	2.30
				5JI0	1.98
				5LYQ	2.17
				5MJ5	1.90
				5MK4	2.0
				5MKJ	2.50
				5MKU	1.78
				6A5Y	2.10
